# Supplementary material for: Molten salt assisted fabrication of coal-based carbon anode materials for efficient Na ion storage
Source: Royal Society of Chemistry journal article supplement (doi:10.1039/d3qi01118f), 2023-01-01
Supplement: d3qi01118f1.pdf [file d3qi01118f1.pdf]

## Supporting Information

### Molten salt assisted fabrication of coal-based carbon anode materials for efficient Na ion storage

Wei Zhang, Ning Sun\*, He Chen, Razium Ali Soomro, Bin Xu\*

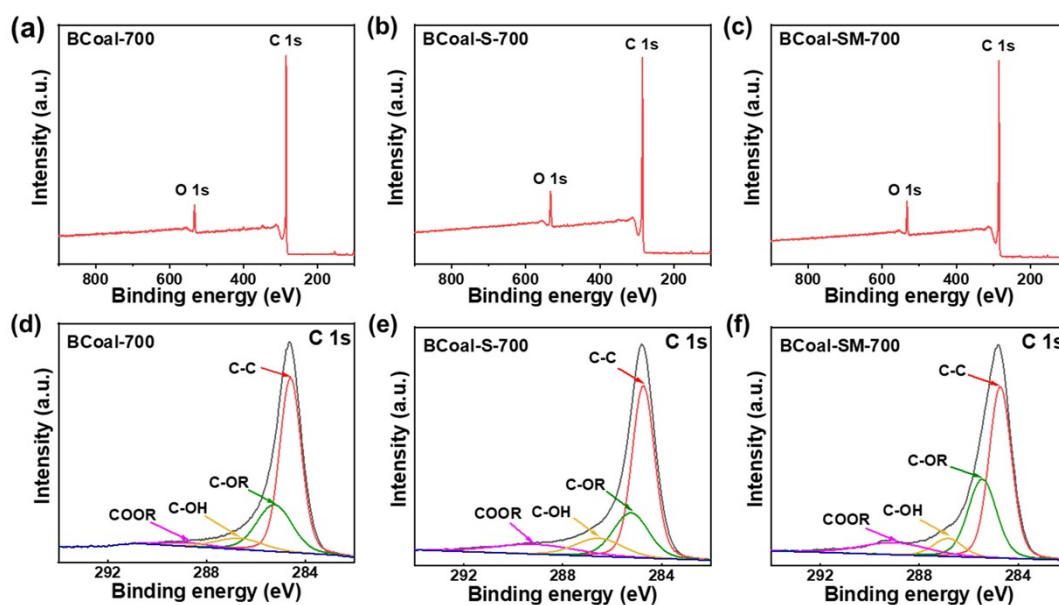

**Fig. S1** (a-c) XPS total spectrum and (d-f) C 1s peak curve of coal-based carbon materials BCoal-700, BCoal-S-700 and BCoal-SM-700 in molten salt system.

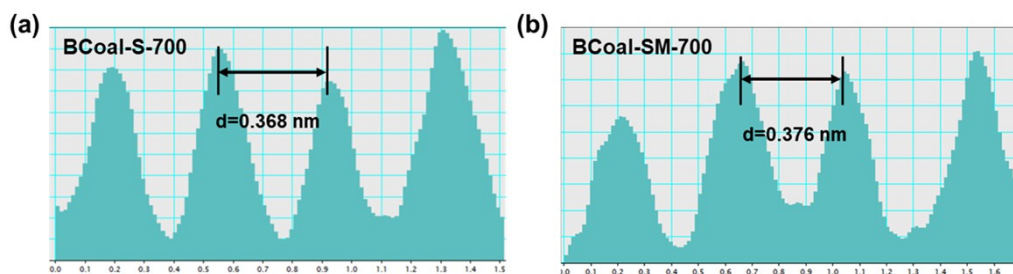

**Fig. S2** The fast Fourier transform (FFT) patterns of (a) BCoal-S-700 and (b) BCoal-SM-700.

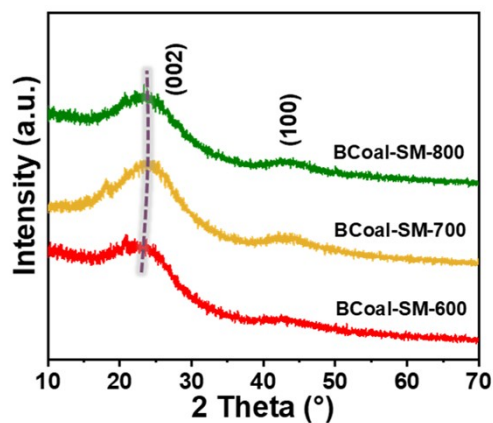

**Fig. S3** XRD patterns of coal-based carbon materials in molten salt system at different pyrolysis temperatures.

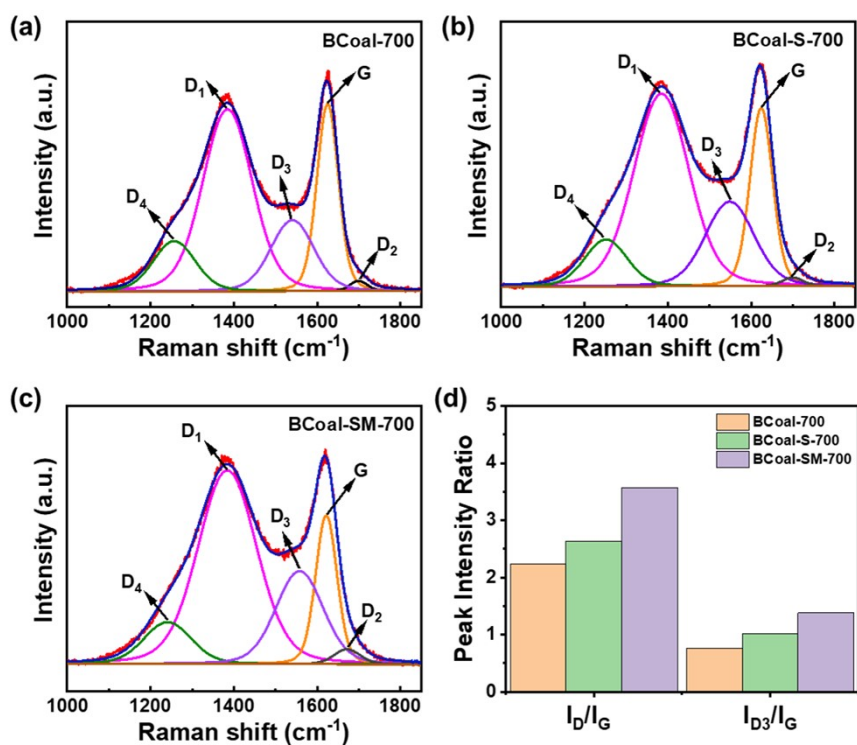

**Fig. S4** Raman spectra of (a) BCcoal-700, (b) BCcoal-S-700 and (c) BCcoal-SM-700, and (d) the corresponding peak intensity ratio.

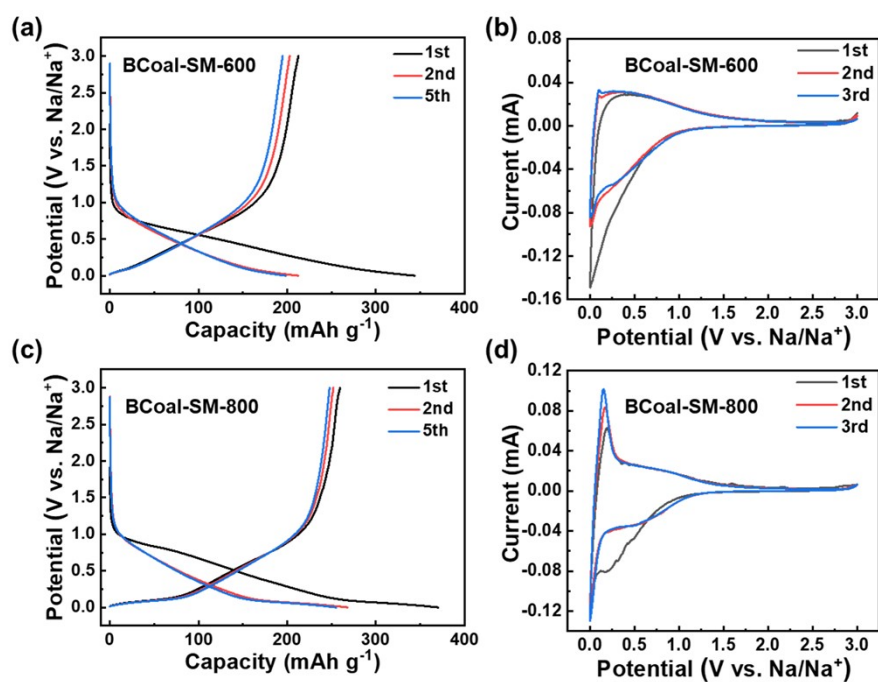

**Fig. S5** Charge/discharge curve at 0.1 C for (a) BCoal-SM-600 and (c) BCoal-SM-800; CV curve at 0.1 mV s<sup>-1</sup> for (b) BCoal-SM-600 and (d) BCoal-SM-800.

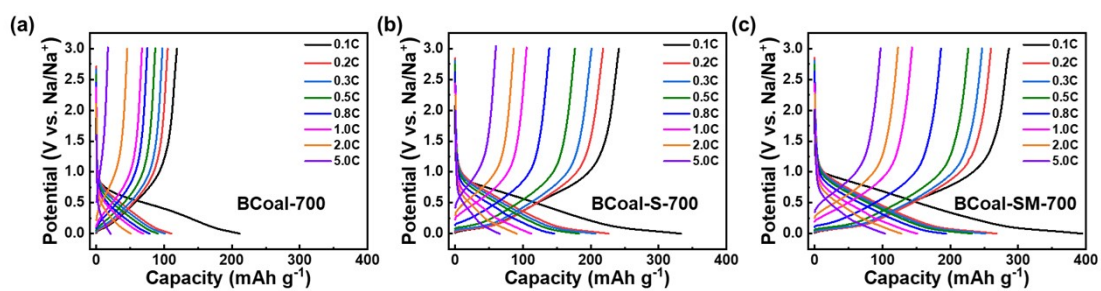

**Fig. S6** The charge/discharge curves at different current rates of the (a) BCoal-700, (b) BCoal-S-700 and (c) BCoal-SM-700 electrodes.

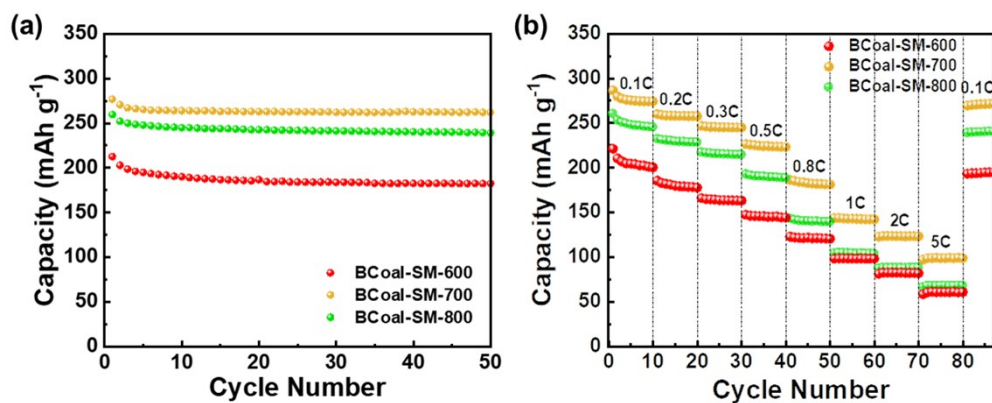

**Fig. S7** (a) cycle performance at 0.1C and (b) rate performance of coal-based carbon materials in molten salt system at different pyrolysis temperatures.

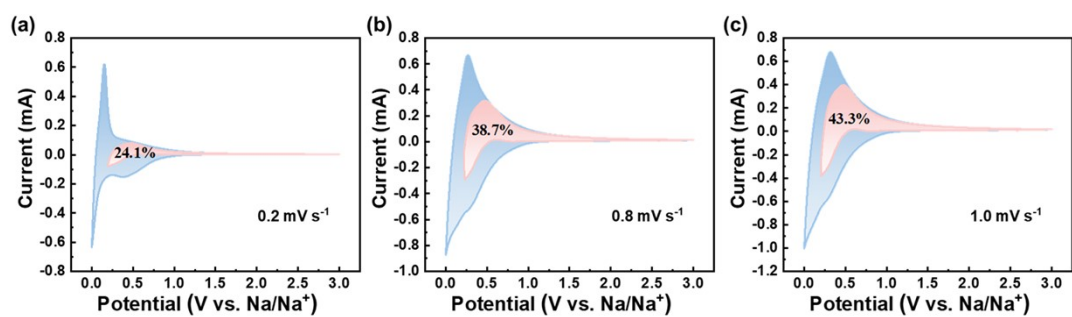

**Fig. S8** Pseudo-capacitance contribution of BCoal-SM-700 electrode at different scanning rates.
